# Supplementary material for: The Length of Hydrophobic Chain in Amphiphilic Polypeptides Regulates the Efficiency of Gene Delivery
Source: Polymers (Basel). 2018 Apr 1;10(4):379. doi: 10.3390/polym10040379 (PMC6415248; doi:10.3390/polym10040379)
Supplement: Supplementary file 1 [file polymers-10-00379-s001.docx]

Supplementary Materials

The Length of Hydrophobic Chain in Amphiphilic Polypeptides Regulates the Efficiency of Gene Delivery

Ying Zhang 1,2, Zhiping Zhou 1,* and Mingsheng Chen 3,*

1 School of Material Science & Engineering, Jiangsu University, 301 Xuefu Road, Zhenjiang 212013, China; monicazying@163.com

2 School of Environmental and Chemical Engineering, Jiangsu University of Science and Technology, 2 Mengxi Road, Zhenjiang 212003, China

3 Department of Pharmaceutical Sciences, College of Pharmacy, University of Michigan, Ann Arbor,
MI 48109, USA

***** Correspondence: zhouzp@ujs.edu.cn (Z.Z.); mingshec@umich.edu (M.C.).


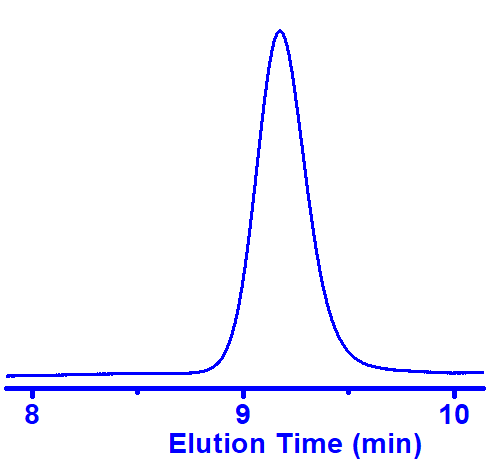


**Figure S1.** SEC trace of Poly(l-lysine(CBZ))*50.*


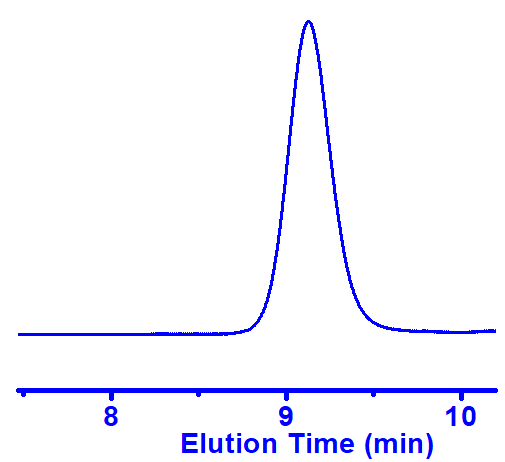


**Figure S2.** SEC trace of poly(l-lysine(CBZ))50-*block*-poly(l-leucine)10.


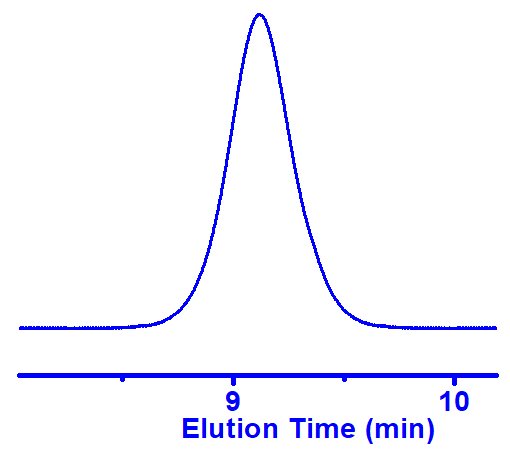


**Figure S3.** SEC trace of poly(l-lysine(CBZ))50-block-Poly(l-leucine)15.


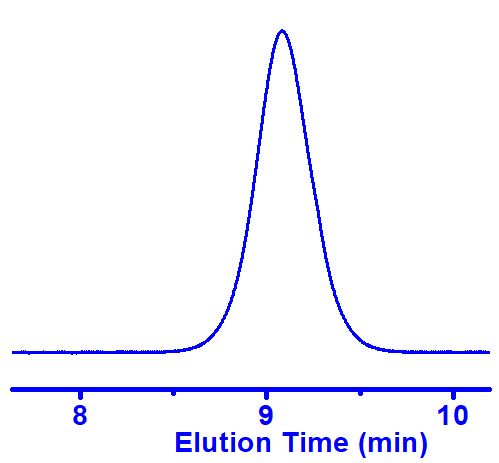


**Figure S4.** SEC trace of poly(l-lysine(CBZ))50-block-poly(l-leucine)25.


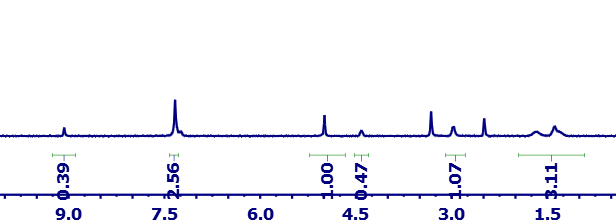


**Figure S5.** 1H NMR spectrum and integrals of l-lysine(CBZ)-NCA in DMSO.


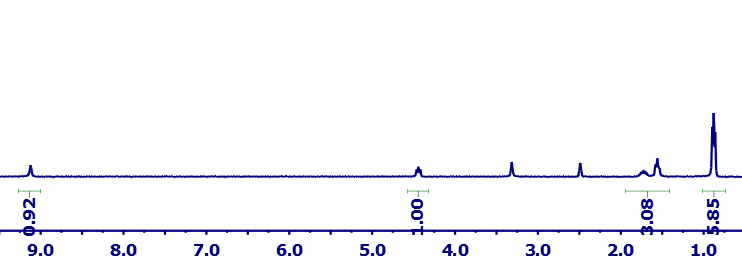


**Figure S6.** 1H NMR spectrum and integrals of l-leucine-NCA in DMSO.

**Figure S7.** 1H NMR spectrum and integrals of poly(l-lysine(CBZ))50-*block*-poly(l-leucine)10 in DMSO-*d6*.

**Figure S8.** 1H NMR spectrum and integrals of poly(l-lysine(CBZ))50-*block*-poly(l-leucine)15 in DMSO-*d6*.

**Figure S9.** 1H NMR spectrum and integrals of poly(l-lysine(CBZ))50-*block*-poly(l-leucine)25 in DMSO-*d6*.


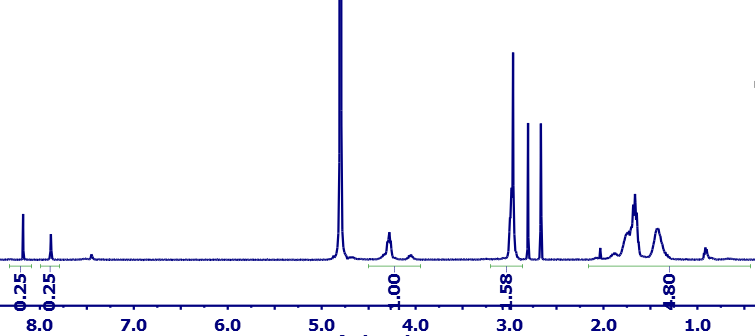


**Figure S10.** 1H NMR spectrum and integralspoly(l-lysine)50-block-poly(l-leucine)10 in D2O.


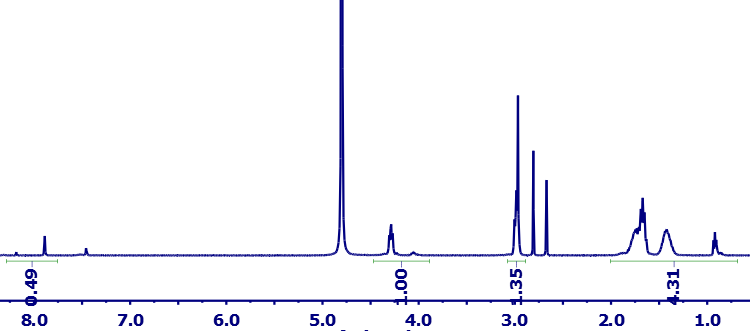


**Figure S11.** 1H NMR spectrum and integralsof poly(l-lysine)50-*block*-poly(l-leucine)15 in D2O.


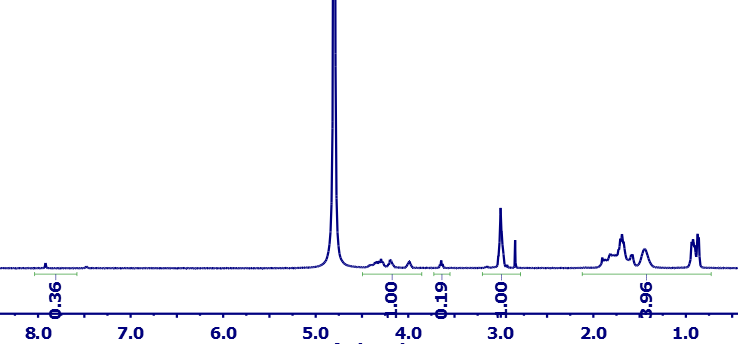


**Figure S12.** 1H NMR spectrum and integralsof poly(l-lysine)50-*block*-poly(l-leucine)25 in D2O.


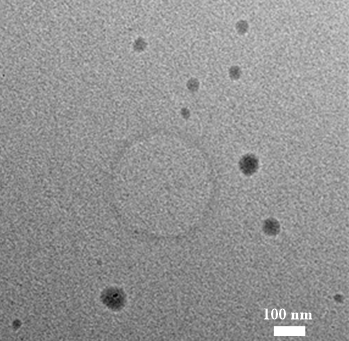

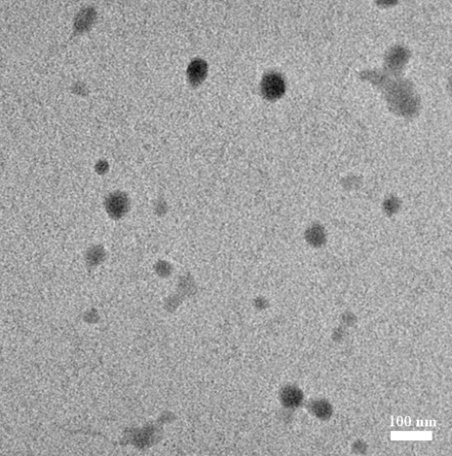


**Figure S13.** TEM of polyplexes of poly(l-lysine)50-*block*-poly(l-leucine)10/pDNA (left) and poly(l-lysine)50-*block*-poly(l-leucine)25/pDNA (right) at N/P=15.

**Figure S14.** AGE of polyplexes of poly(l-lysine)50-*block*-poly(l-leucine)10/pDNA (left) and poly(l-lysine)50-*block*-poly(l-leucine)25/pDNA (right) at various N/P ratios.

© 2018 by the authors. Submitted for possible open access publication under the
terms and conditions of the Creative Commons Attribution (CC BY) license (http://creativecommons.org/licenses/by/4.0/).
